# Supplementary material for: Bio ionic liquids and water mixtures: a structural study
Source: Royal Society of Chemistry journal article supplement (doi:10.1039/c6ra28545g), 2017-01-01
Supplement: c6ra28545g1.pdf [file c6ra28545g1.pdf]

## SUPPORTING INFORMATION

### Bio Ionic Liquids and Water Mixtures: a Structural Study

Lorenzo Gontrani<sup>a\*</sup>, Eleonora Scarpellini<sup>a</sup>, Ruggero Caminiti<sup>a</sup> and Marco Campetella<sup>a\*</sup>

*a) Dipartimento di Chimica, Sapienza Università di Roma*

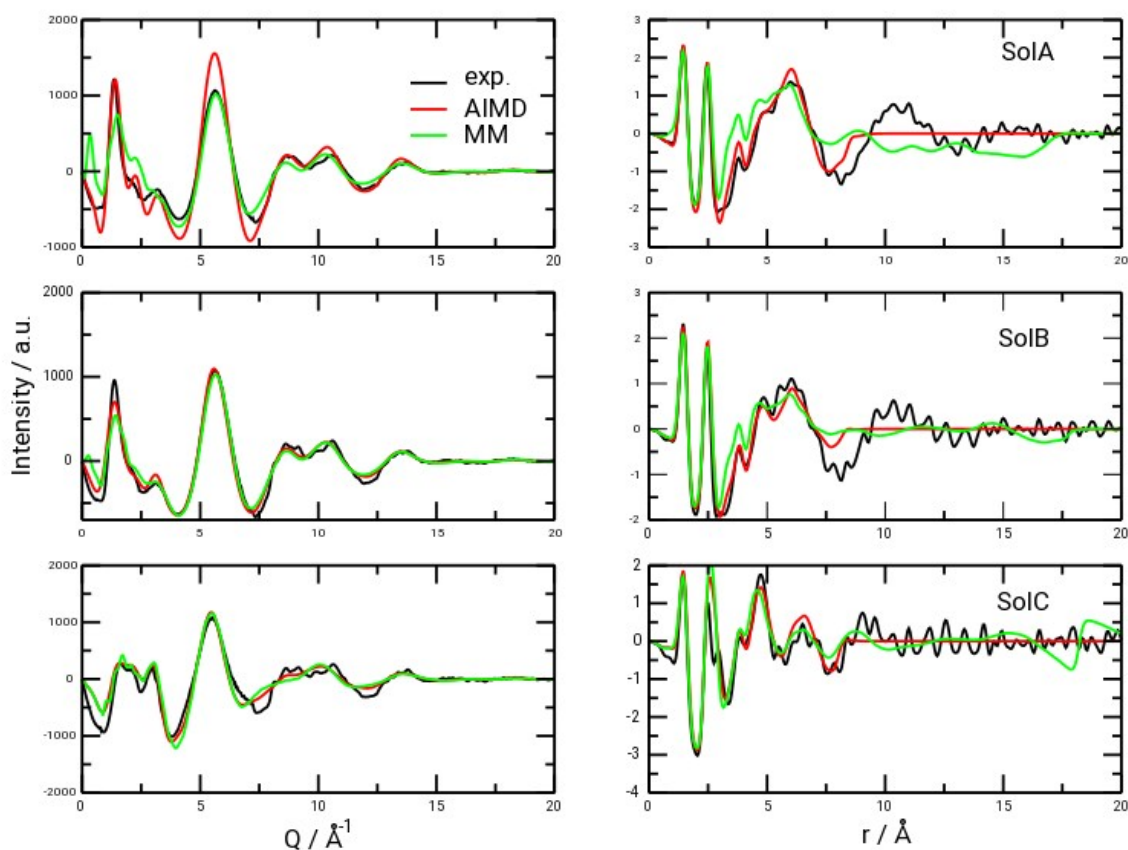

**Fig. 1 :** Left side: theoretical and measured structure function. Right side: theoretical and measured radial distribution function. Moving from top to bottom the water concentration increases.
